# Supplementary material for: Ruthenium single-atom catalysis for electrocatalytic nitrogen reduction unveiled by grand canonical density functional theory
Source: Royal Society of Chemistry journal article supplement (doi:10.1039/d0ta06672a), 2020-01-01
Supplement: d0ta06672a1.pdf [file d0ta06672a1.pdf]

## Supporting Information for

# **Ruthenium Single-Atom Catalysis for Electrocatalytic Nitrogen Reduction Unveiled by Grand Canonical Density Functional Theory**

*Yujin Ji<sup>1\*</sup>, Yifan Li<sup>2</sup>, Huilong Dong<sup>3</sup>, Lifeng Ding<sup>4</sup> and Youyong Li<sup>1\*</sup>*

<sup>1</sup> *Institute of Functional Nano & Soft Materials (FUNSOM), Jiangsu Key Laboratory for Carbon-Based Functional Materials & Devices, Soochow University, Suzhou, Jiangsu 215123, China*

<sup>2</sup> *Key Laboratory for Liquid-Solid Structural Evolution and Processing of Materials, Ministry of Education, Shandong University, Jinan, Shandong 250061, China*

<sup>3</sup> *School of Materials Engineering, Changshu Institute of Technology, Changshu, Jiangsu 215500, China*

<sup>4</sup> *Department of Chemistry, Xi'an JiaoTong-Liverpool University, 111 Ren'ai Road, Suzhou Dushu Lake, Higher Education Town, Jiangsu Province 215123, China*

\*Corresponding author

## Supplementary Note S1

It should be noted that the definition of the grand canonical energy  $\Omega$  in this manuscript is different with that in the JDFTx manual [1] because we adopt a different energy reference. In the JDFTx manual, they view the single-electron energy as a reference so the  $E_{SCF}$  needs to subtract all-electron energy contribution while in our method, the energy in the constant charge model is set as a standard and we only need to consider the electron change. We can prove that this definition difference has no influence on the relative energy/adsorption energy, namely

$$\Delta G = \Delta \Omega$$

Detailed derivation is as follows:

### Step 1: (Definition of physical parameters)

$\mu_e$ : Electronic chemical potential, namely -4.66 in U=0 V/SHE.

$E_{SCF}/F$ : Total energy in the SCF calculation

$N_0$ : Total valance electron number

$N$ : Optimized valance electron number at a fixed electrode potential

$N_e = N - N_0$ : Number of valance electron change

### Step 2: (Deduction)

JDFTx definition of the **grand free energy**  $G = F - N\mu_e = E_{SCF} - N\mu_e$

Our definition of the **grand canonical energy**  $\Omega = E_{SCF} + N_e\mu_e$

For a simple reaction  $A+B \rightarrow AB$ ,

$$\Delta G = E_{SCF}(AB) - N(AB)\mu_e - [E_{SCF}(A) - N(A)\mu_e + E_{SCF}(B) - N(B)\mu_e]$$

$$= E_{SCF}(AB) - E(A) - E(B) + [N(A) + N(B) - N(AB)]\mu_e$$

$$= E_{SCF}(AB) - E(A) - E(B) + [N_0(A) + N_e(A) + N_0(B) + N_e(B)]\mu_e$$

$$= \Omega(AB) - \Omega(A) - \Omega(B) + [N_0(A) + N_0(B) - N_0(AB)]\mu_e$$

$$= \Delta\Omega$$

Thus,

$$\Delta G = \Delta\Omega$$

As a quantitative example, we proved that this energy definition has no influence on the adsorption free energy of \*N<sub>2</sub>.

| Ru-N <sub>4</sub> | $E_{SCF}/F$ (eV) | $N_0$ | $N$    | $N_e$ | $\mu_e$ (eV) | $G$ (eV)  | $\Omega$ (eV) |
|-------------------|------------------|-------|--------|-------|--------------|-----------|---------------|
| N <sub>2</sub>    | -398.45          | 10    | 10.00  | 0.00  | -4.66        | -589.74   | -543.14       |
| *                 | -12030.26        | 252   | 251.23 | -0.77 | -4.66        | -13231.10 | -12056.78     |
| *N <sub>2</sub>   | -12604.90        | 262   | 261.21 | -0.79 | -4.66        | -13822.10 | -12601.18     |

$$\Delta G = G(*N_2) - G(N_2) - G(*) = -1.27$$

$$\Delta\Omega = \Omega(*N_2) - \Omega(N_2) - \Omega(*) = -1.27$$

## References

[1] <http://jdftx.org/FixedPotential.html>

## Supplementary Note S2

**Figure S1** clearly indicates that the Ru-N<sub>4</sub> motifs with -1.0, 0.0 and 1.0 net electrons after 5 ps MD tended to be equilibrated and the final configurations of Ru-N<sub>4</sub> still retained their integrities. Therefore, the GC-DFT has no influence on the stability of the Ru-N<sub>4</sub> catalysts under realistic conditions.

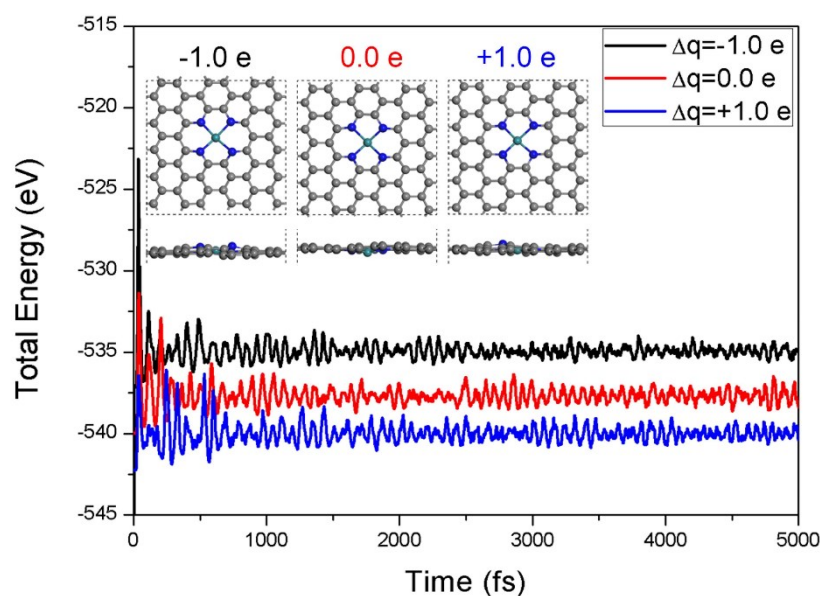

**Figure S1.** 5 ps *ab initio* molecular dynamic trajectories of the Ru-N<sub>4</sub> motifs with net charges of (a) -1.0, (b) 0.0 and (c) +1.0 electron. The insert is the top view and side view of the relaxed geometry configurations at the final state.

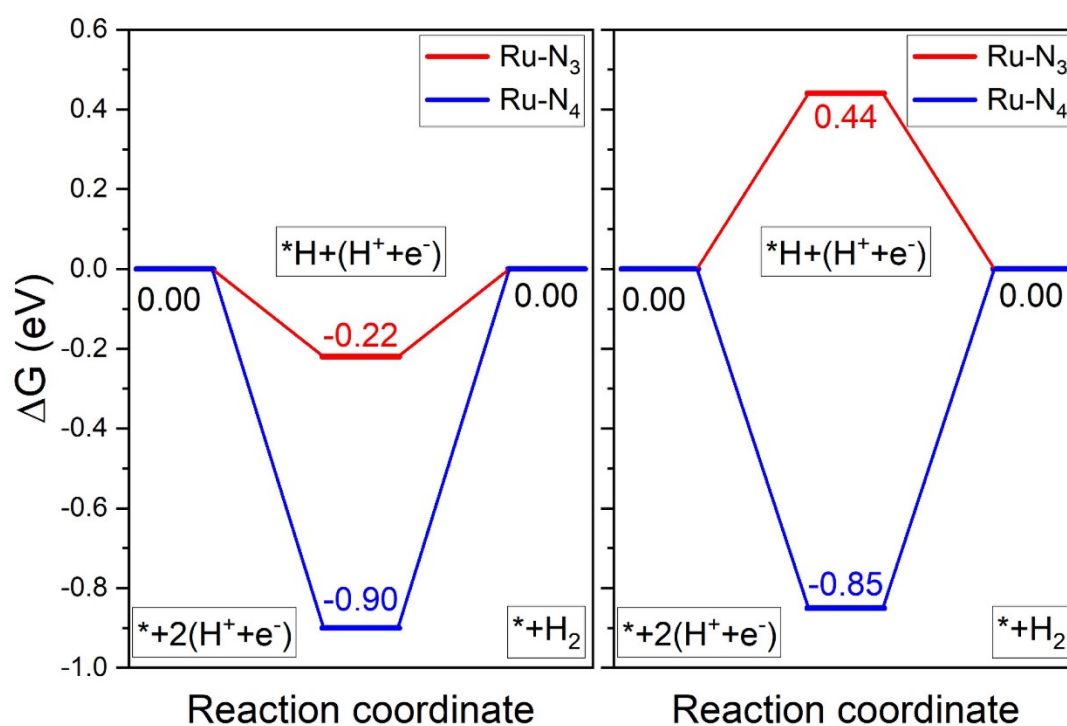

**Figure S2.** Free energy evolution diagrams for the hydrogen evolution reaction on Ru-N<sub>3</sub> and Ru-N<sub>4</sub> sites. The left and right are corresponding to the CCM and CPM, accordingly.

**Table S1.** Adsorption free energies of \*N<sub>2</sub> and \*H on Ru-N<sub>3</sub> and Ru-N<sub>4</sub> reaction sites based on the CCM and CPM.

| $\Delta G$ (eV)   | CCM             |       | CPM             |       |
|-------------------|-----------------|-------|-----------------|-------|
|                   | *N <sub>2</sub> | *H    | *N <sub>2</sub> | *H    |
| Ru-N <sub>3</sub> | <b>-0.99</b>    | -0.22 | <b>-0.64</b>    | 0.44  |
| Ru-N <sub>4</sub> | <b>-1.17</b>    | -0.90 | <b>-1.08</b>    | -0.85 |
